# Supplementary material for: REC-1 and HIM-5 distribute meiotic crossovers and function redundantly in meiotic double-strand break formation in Caenorhabditis elegans
Source: PubMed Central journal article supplement (PMC4579353; doi:10.1101/gad.266056.115), 2015-09-15

# Supplemental Figures

## Supplemental Figure 1

Chung\_SuppFig1

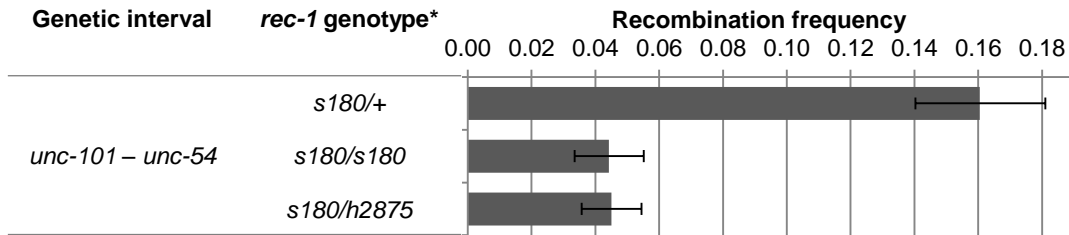

Supplemental Figures  
**Supplemental Figure 2**

**A**

| Gamete type       | Genotype at    |          |          |          |          | Numbers observed in |                     |
|-------------------|----------------|----------|----------|----------|----------|---------------------|---------------------|
|                   | Site A*        | Site B   | Site C   | Site D   | Site E   | <i>rec-1(+)</i>     | <i>rec-1(h2875)</i> |
| i                 | <i>B</i>       | <i>B</i> | <i>B</i> | <i>B</i> | <i>B</i> | 38                  | 27                  |
| ii                | <i>H</i>       | <i>H</i> | <i>H</i> | <i>H</i> | <i>H</i> | 29                  | 41                  |
| iii               | <i>B</i>       | <i>H</i> | <i>H</i> | <i>H</i> | <i>H</i> | 8                   | 5                   |
| iv                | <i>H</i>       | <i>B</i> | <i>B</i> | <i>B</i> | <i>B</i> | 10                  | 2                   |
| v                 | <i>B</i>       | <i>B</i> | <i>H</i> | <i>H</i> | <i>H</i> | 1                   | 6                   |
| vi                | <i>H</i>       | <i>H</i> | <i>B</i> | <i>B</i> | <i>B</i> | 2                   | 5                   |
| vii               | <i>B</i>       | <i>B</i> | <i>B</i> | <i>H</i> | <i>H</i> | 2                   | 4                   |
| viii              | <i>H</i>       | <i>H</i> | <i>H</i> | <i>B</i> | <i>B</i> | 1                   | 7                   |
| ix                | <i>B</i>       | <i>B</i> | <i>B</i> | <i>B</i> | <i>H</i> | 4                   | 4                   |
| x                 | <i>H</i>       | <i>H</i> | <i>H</i> | <i>H</i> | <i>B</i> | 3                   | 5                   |
| with >1 crossover | (not observed) |          |          |          |          | 0                   | 0                   |
| Total             |                |          |          |          |          | 98                  | 106                 |

**B**

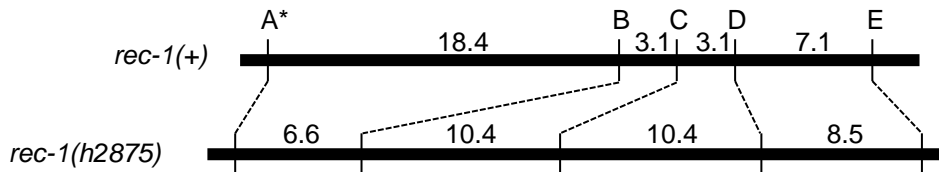

# Supplemental Figures

## Supplemental Figure 3

Chung\_SuppFig3

CLUSTAL 2.1 multiple sequence alignment

```
Celeg_rec-1-N  MFGNDDIVMLSDIIVADLRREIASRPVIFDRRPGYVPTPWVNCWKEIIEIWSDDSEDD 60
Crem_rec-1-N  MEDDDDLIEITDEQHAREIRATIGKRF--FDH---LRLDLQLSDSEHRCESSESEDD 55
               * .:***: ::** * :* *..** :**: : : . .* . *::****

Celeg_rec-1-N  DGD-----VITGSQEAQLKR 75
Crem_rec-1-N  EGGELFYKRNTLRVITVQEAATKR 80
               :* . * * :*** :**
```

Supplemental Figures  
**Supplemental Figure 4**

Chung\_SuppFig4

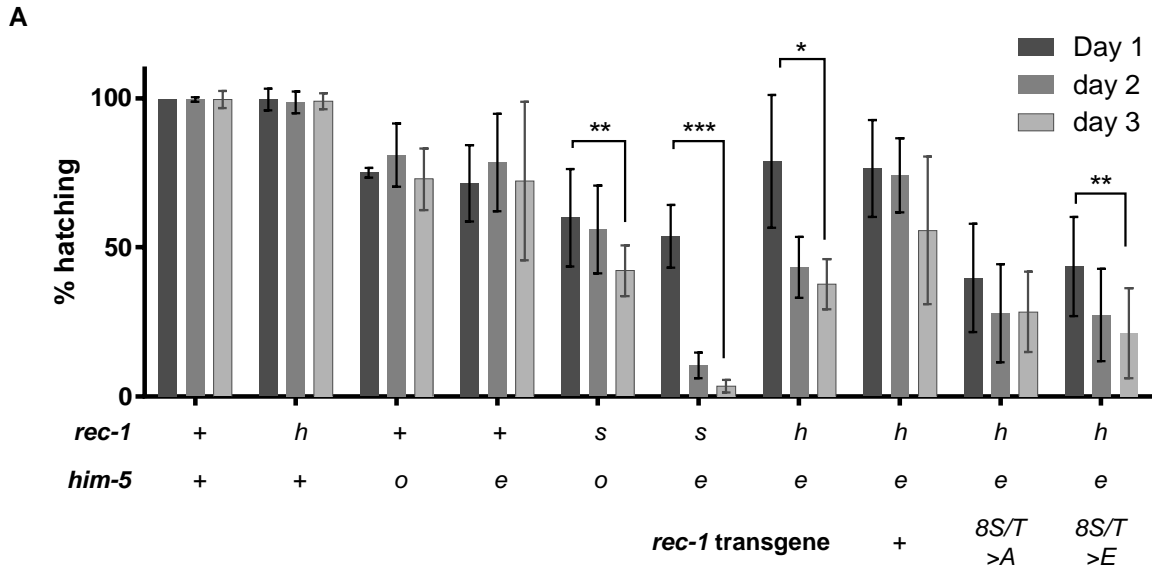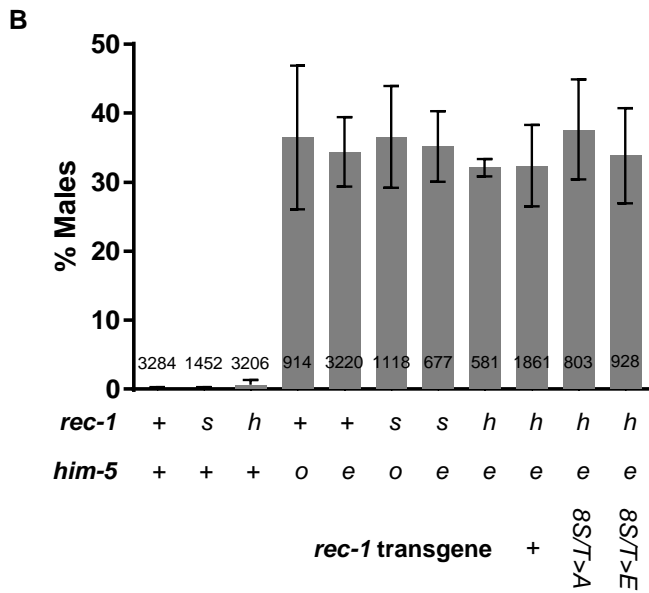

Supplemental Figures  
Supplemental Figure 5

Chung\_SuppFig5

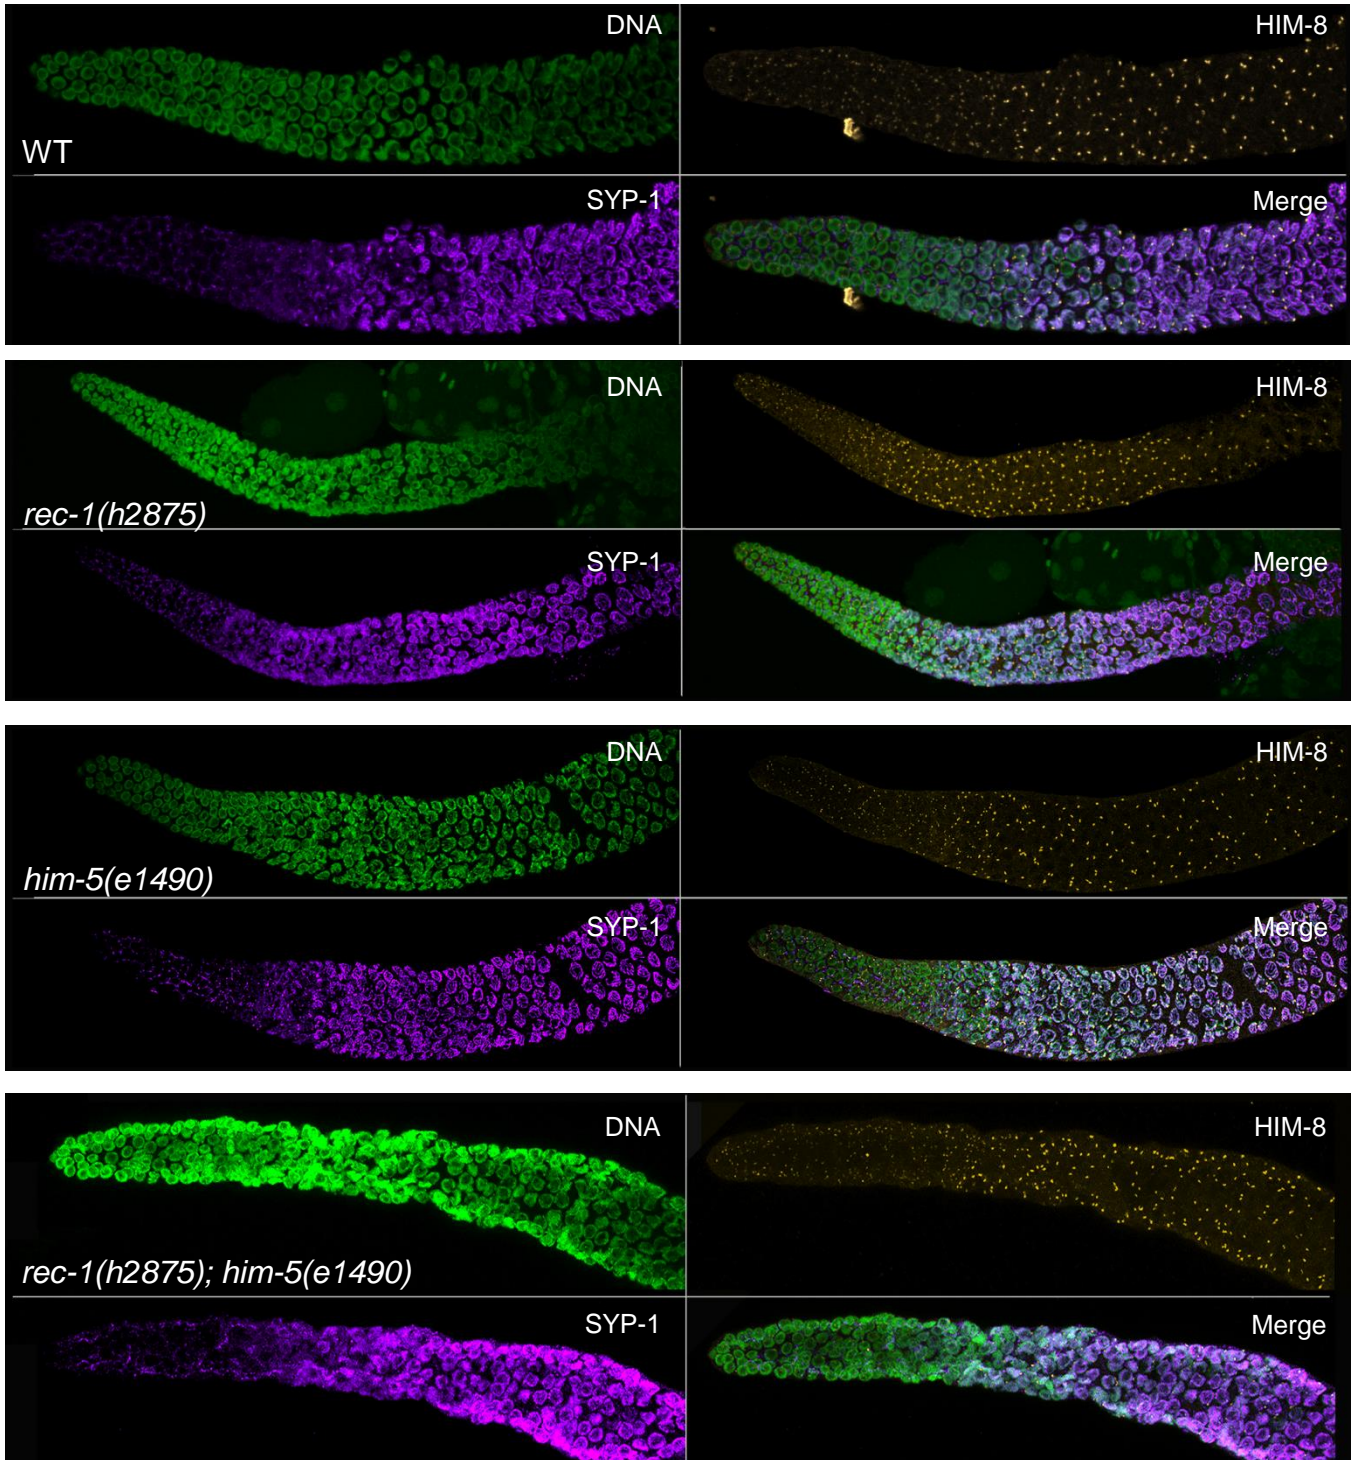

Supplemental Figures  
Supplemental Figure 6

Chung\_SuppFig6

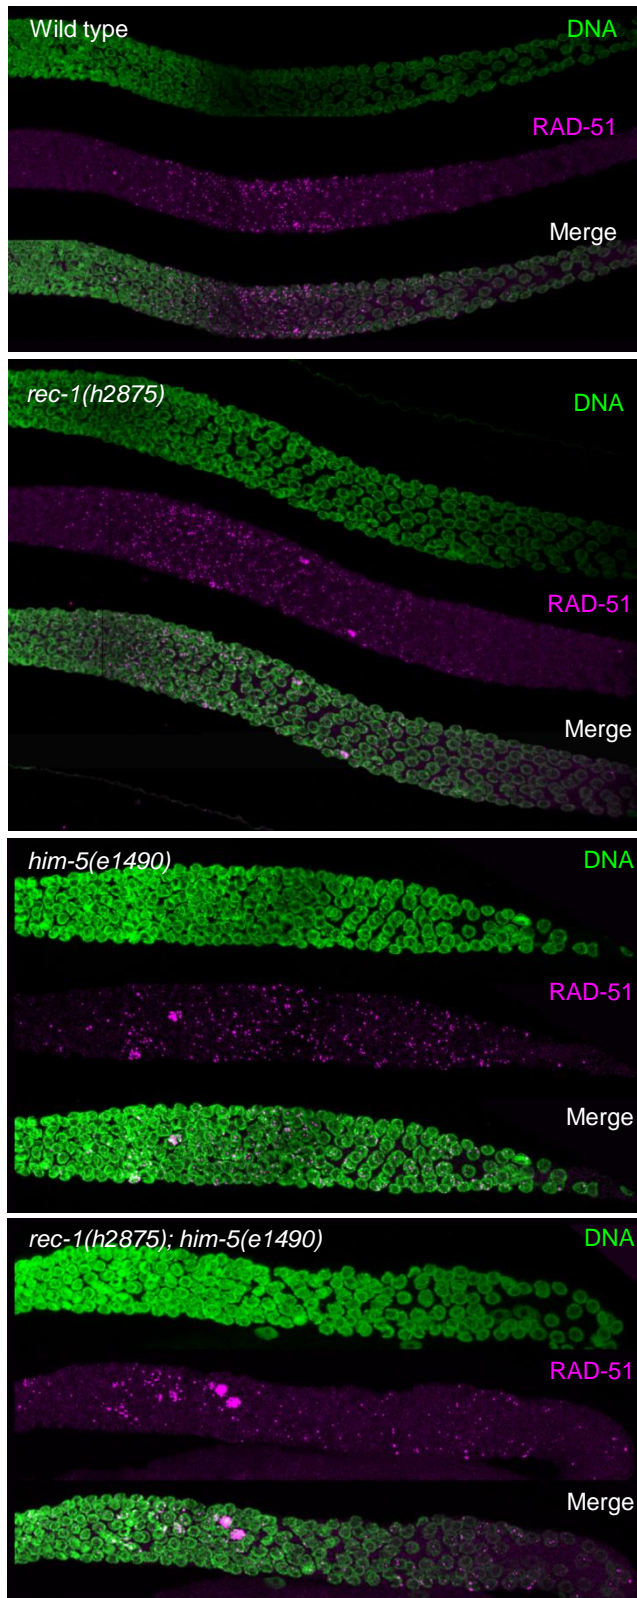

Supplement: supp_29.18.1969_Supplemental_Figures.pdf [file supp_29.18.1969_Supplemental_Figures.pdf]
